# Supplementary material for: Highly sensitive broadband flexible photodetectors based on a blend film with zinc octaethylporphyrin long nanowires embedded in an insulating polymer
Source: Royal Society of Chemistry journal article supplement (doi:10.1039/c5nr08565a), 2015-12-31
Supplement: c5nr08565a1.pdf [file c5nr08565a1.pdf]

*Supporting information for:*

**Highly sensitive broadband flexible photodetectors based on the blend film with zinc octaethylporphyrin long nanowires embedded in an insulating polymer**

Jia-Mei Yang<sup>a,b</sup>, Feng-Xia Wang<sup>a\*</sup>, and Ge-Bo Pan<sup>a,\*</sup>

<sup>a</sup>Suzhou Institute of Nano-tech and Nano-bionics, Chinese Academy of Sciences, Suzhou 215123, P. R. China;

<sup>b</sup>State Key Laboratory for Mechanical Behavior of Materials, Xi'an Jiaotong University, 710049 Xi'an, P. R. China

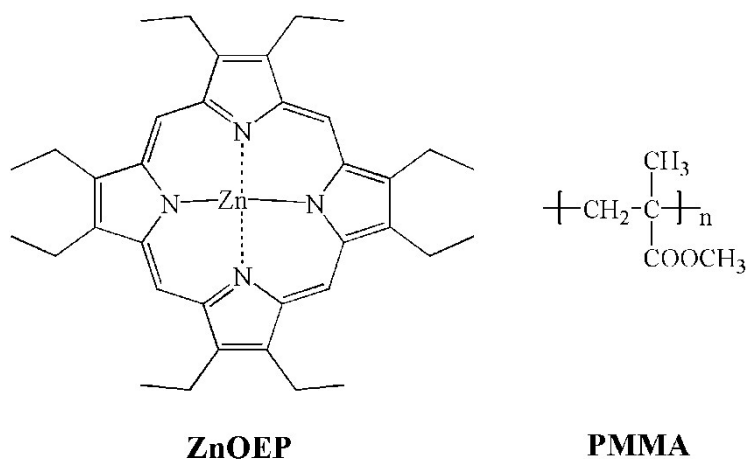

**Figure S1.** Molecular structures of ZnOEP and PMMA.

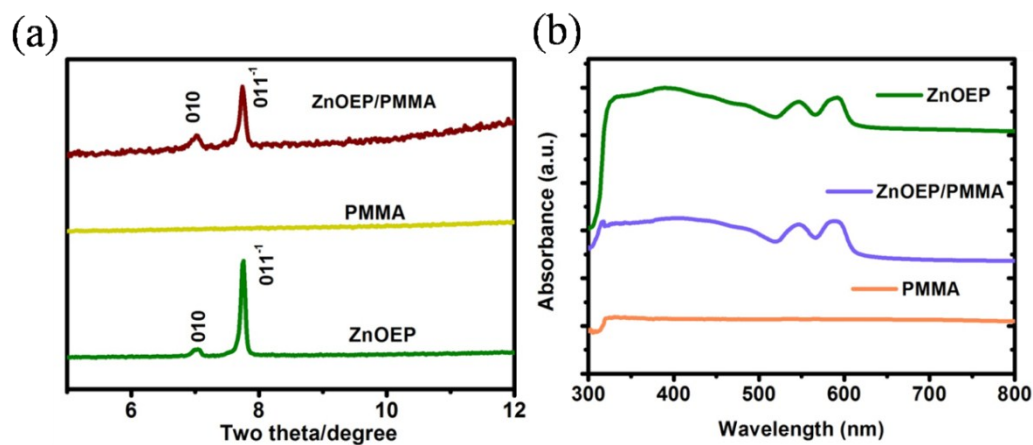

**Figure S2.**(a) XRD and UV-vis absorption spectra of ZnOEP, ZnOEP/PMMA, and PMMA films.

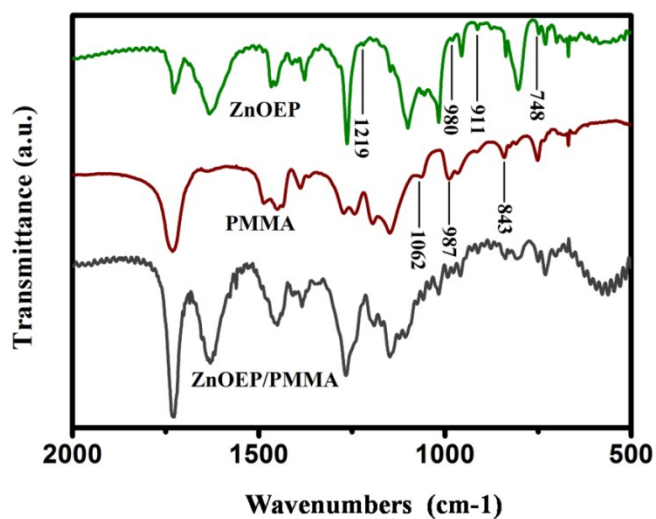

**Figure S3.** FTIR spectra of ZnOEP, ZnOEP/PMMA, and PMMA films.

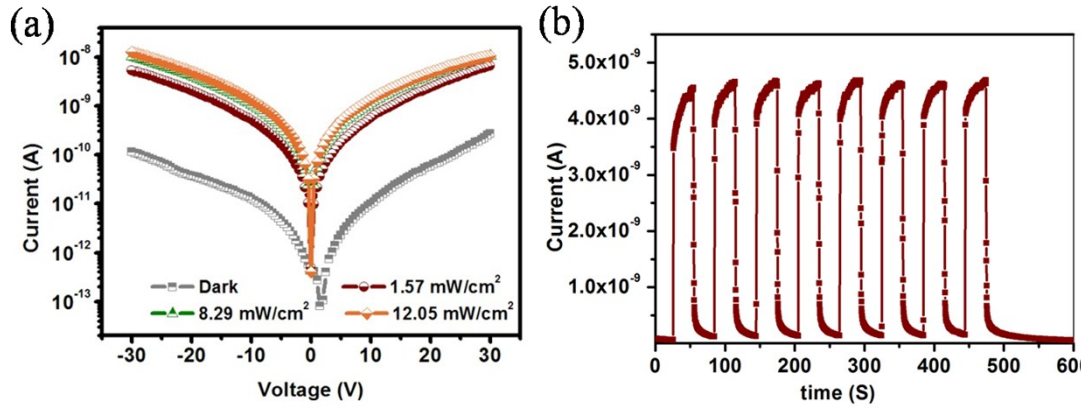

**Figure S4.** (a) Current in dark and under illumination versus voltage at different incident power densities. (b) Time-dependent on/off switching of the photodetector. The light power density was 12.05 mW/cm<sup>2</sup> and the bias of  $V_{DS}$  was 20 V.

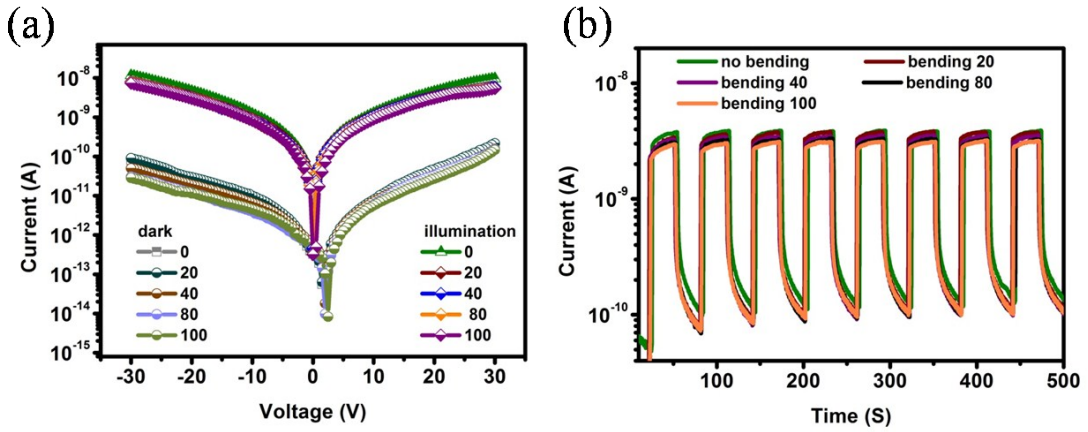

**Figure S5.** (a) Current in dark and under illumination versus voltage after different bending times. (b) Time-dependent on/off switching of the device after different bending times. The light power density was 12.05 mW/cm<sup>2</sup> and the bias of  $V_{DS}$  was 20 V.
